# Supplementary material for: Cell surface functionalization with lysine ligand-containing copolymers for fibrinolytic activity
Source: Royal Society of Chemistry journal article supplement (doi:10.1039/d3ma00737e), 2023-12-02
Supplement: d3ma00737e1.pdf [file d3ma00737e1.pdf]

## Supporting Information

### Cell surface functionalization with lysine ligand-containing copolymers for fibrinolytic activity

Shengjie Liu, Xingyu Heng, Wenjin Wang, He Yang, Wei Sun, Zhaoqiang Wu\* and Hong Chen

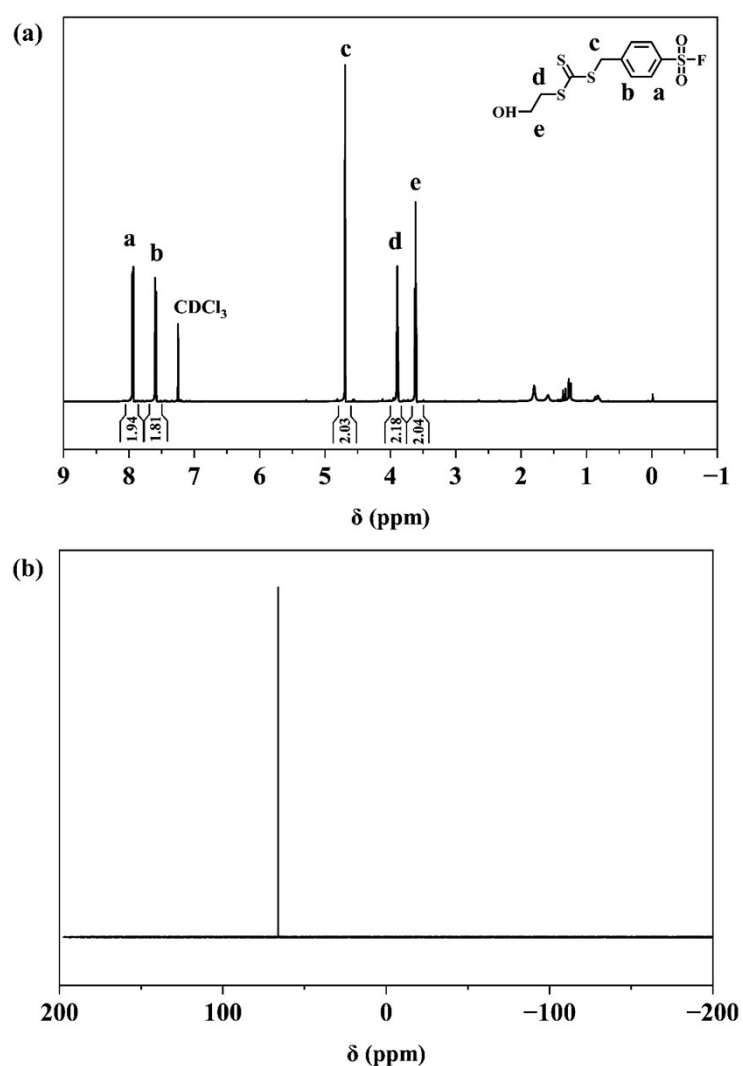

**Figure S1.** (a)  $^1\text{H}$  NMR and (b)  $^{19}\text{F}$  NMR spectra of FSBC in  $\text{CDCl}_3$ .

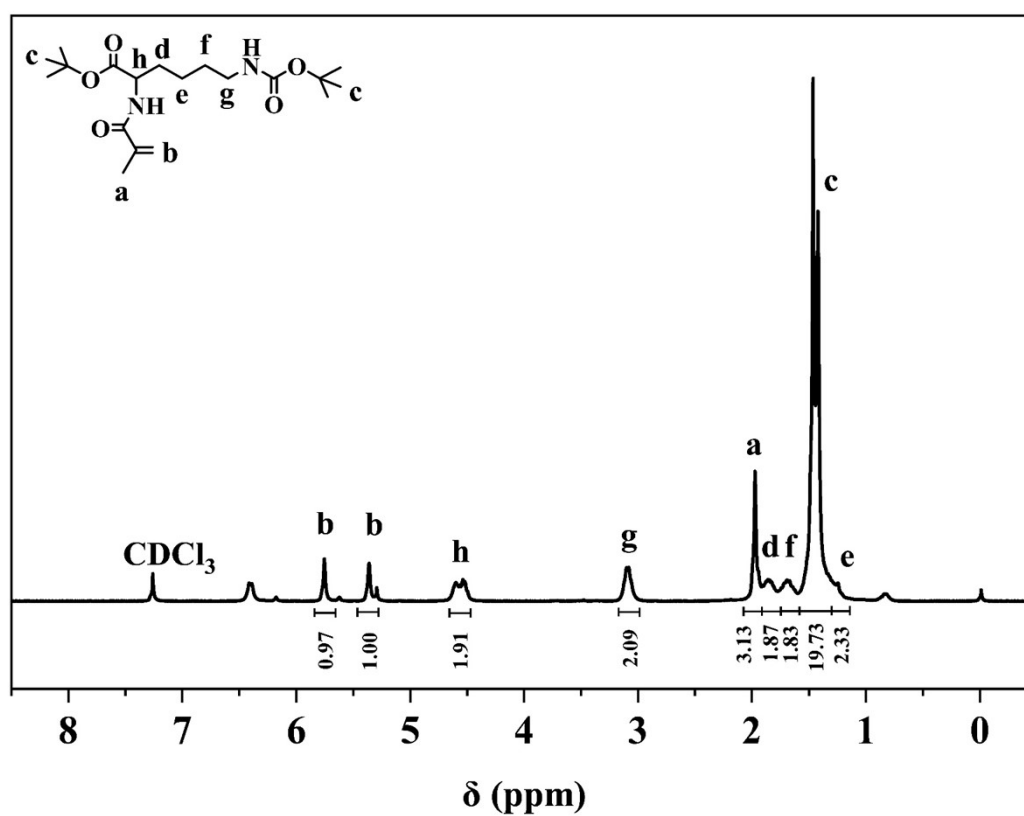

Figure S2.  $^1\text{H}$  NMR spectrum of Lys(P) in  $\text{CDCl}_3$ .

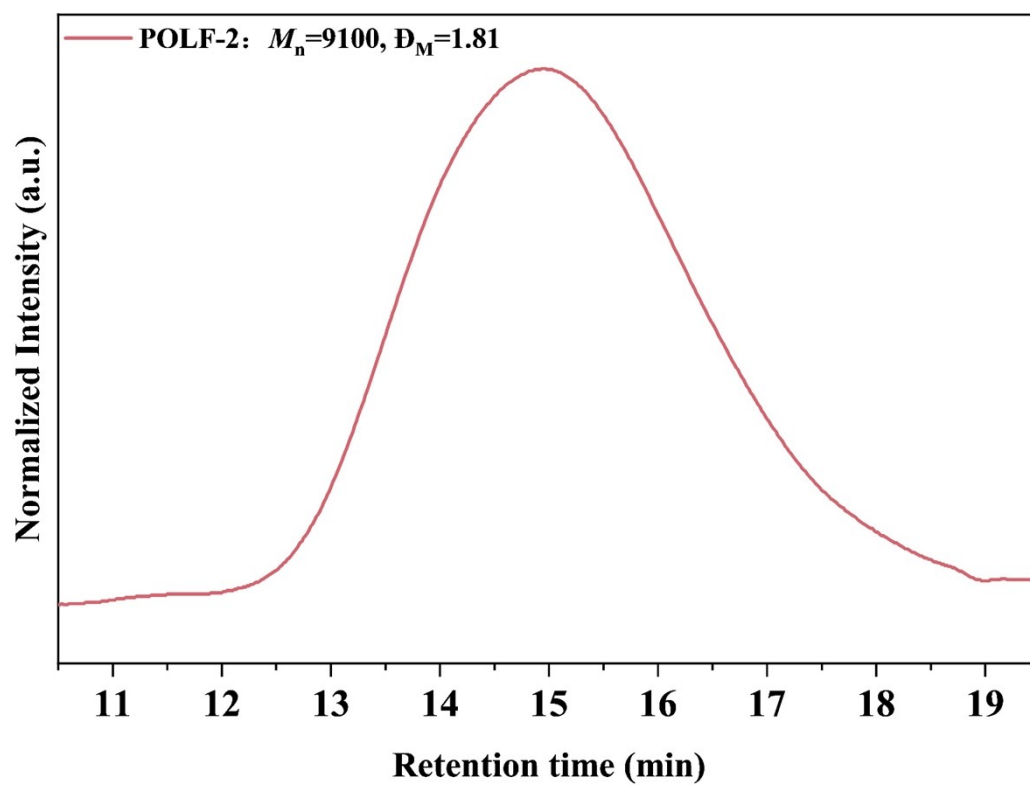

Figure S3. GPC trace of POLF-2.

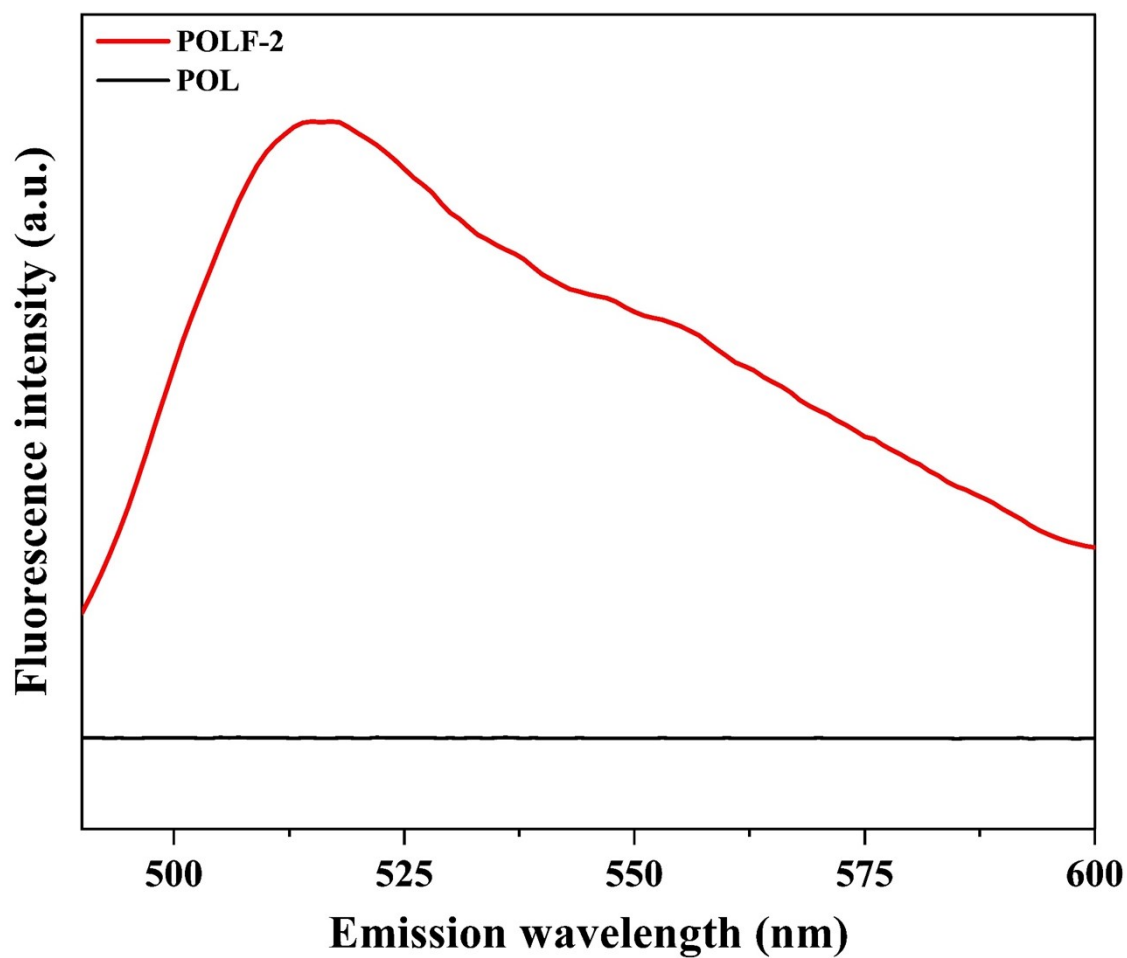

**Figure S4.** Fluorescence emission spectra ( $\lambda_{\text{ex}} = 460$  nm) of POLF-2 and POL aqueous solutions (1 mg/mL).

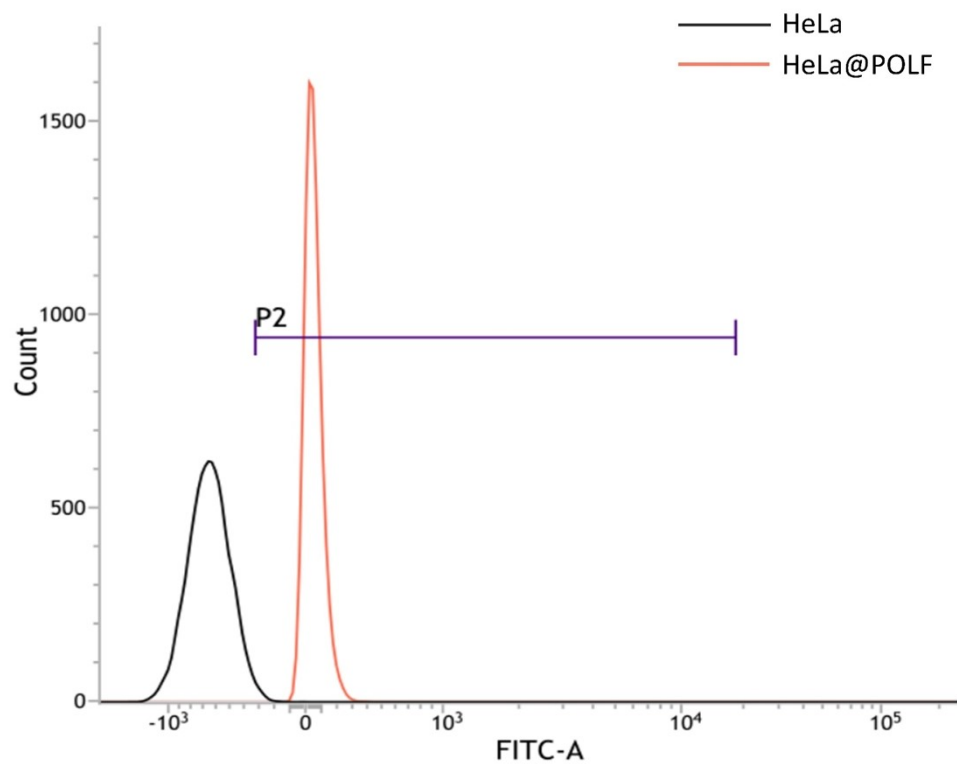

**Figure S5.** Flow cytometric analysis of HeLa cells and HeLa@POLF cells.

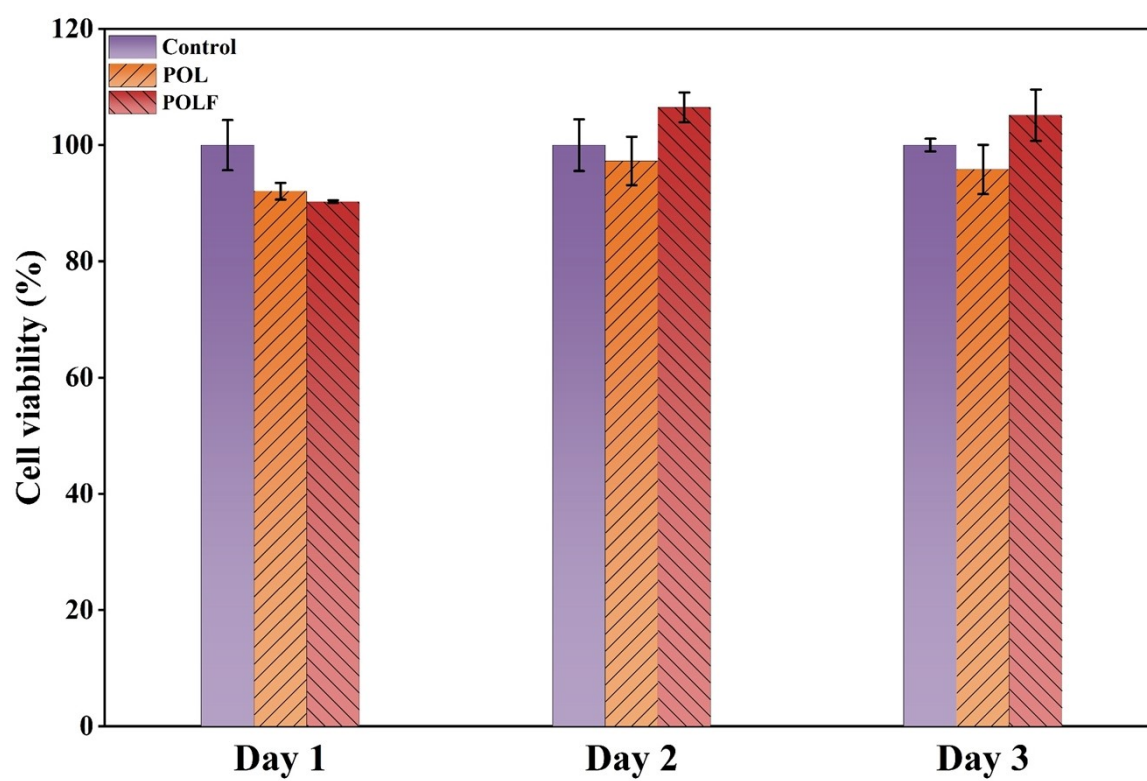

**Figure S6.** Cytotoxicity of POL and POLF by CCK-8 assay.

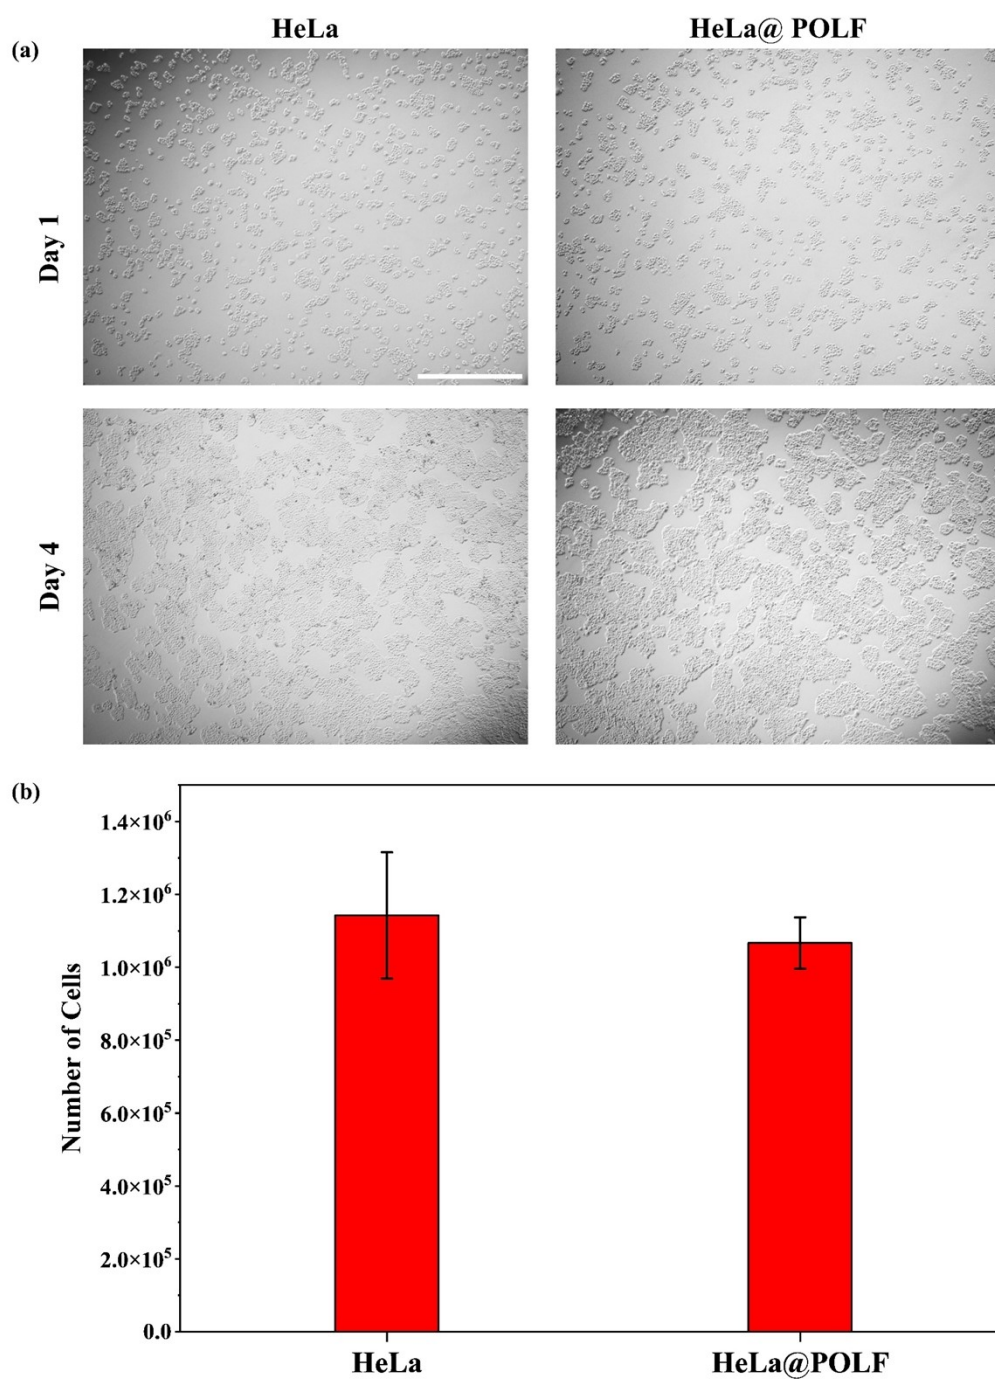

**Figure S7.** (a) Bright field images of HeLa cells and HeLa@POLF (the scale bar is 1000  $\mu\text{m}$ ); (b) the average numbers of cells were counted by a hemocytometer ( $n = 3$ ).

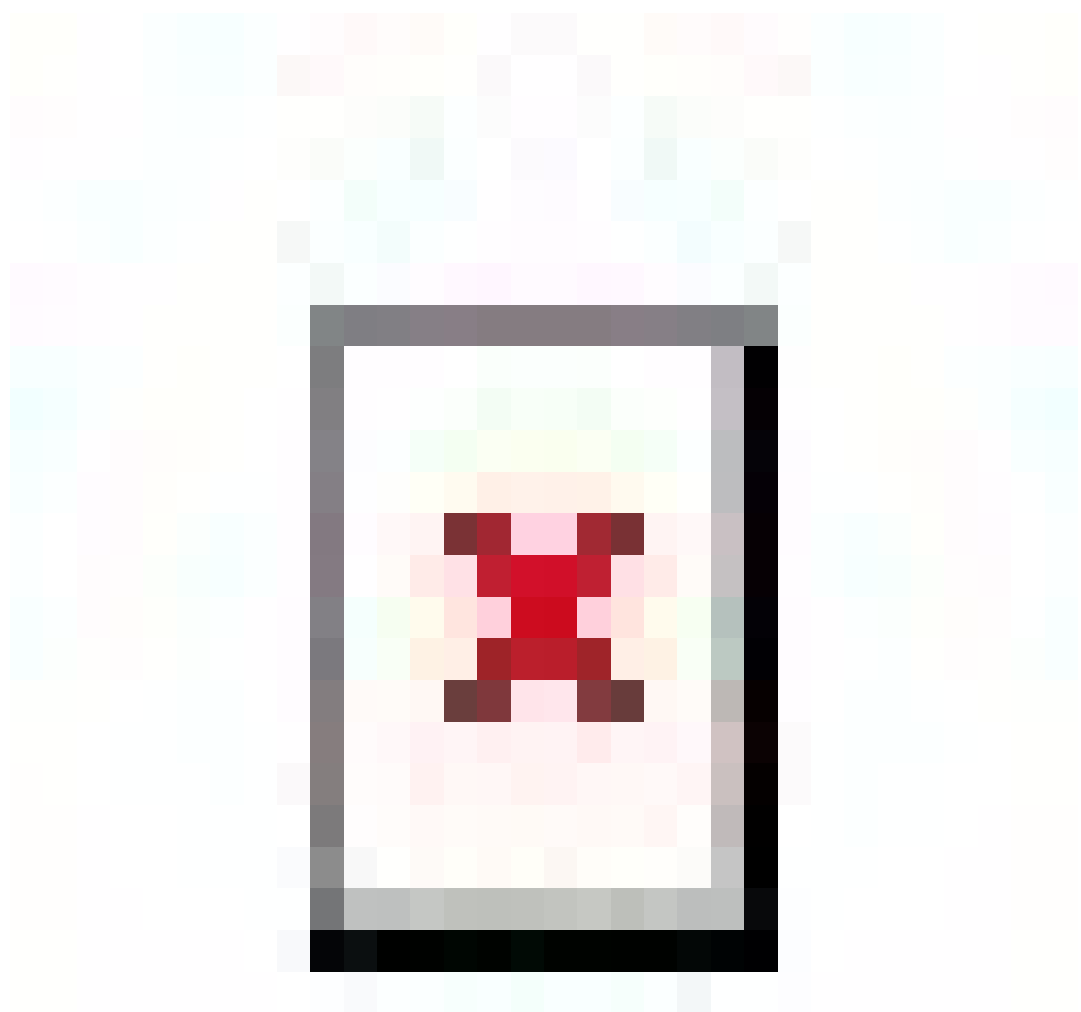

**Figure S8.** Fluorescence and bright field merged images of HSA adsorbed on the surface of HeLa cells, HeLa@Dopa and HeLa@POL: (a) adsorption from plasma; (b) adsorption from 10 mg/mL HSA DMEM solution (the scale bar is 200  $\mu\text{m}$ ); (c) the average fluorescence intensity obtained by ImageJ statistics ( $n > 4$ ); \* $p < 0.05$ ; \*\* $p < 0.01$ ; \*\*\* $p < 0.001$
